# Supplementary material for: Interaction between O-GlcNAc Modification and Tyrosine Phosphorylation of Prohibitin: Implication for a Novel Binary Switch
Source: PLOS journal article supplement (doi:10.1371/journal.pone.0004586), 2009-02-23
Supplement: S1 (10.1371/journal.pone.0004586.s001) [file journal.pone.0004586.s001]

**Table S1.** List of small sequences of short listed proteins using selection criteria # 1 (i.e. proteins with known *O*-GlcNAc modification site(s) (**Sg/Tg**) having proline at either -/+1 and/or -/+3 position (**P**), with potential tyrosine phosphorylation site (**Y**) in the vicinity) showing known *O*-GlcNAc site(s) with potential tyrosine phosphorylation site(s) in the vicinity. Similar residues in prohibitin are also shown.

| Protein                           | Sequence                                                          |
|-----------------------------------|-------------------------------------------------------------------|
| Bassoon                           | 1414 <b>SgPSgTgSgSg</b> TIH <b>SgY</b> GQP <b>PTT</b> 1430        |
| Bassoon                           | 1932 SV <b>TgD</b> TAL <b>PGQSSGPFYSPR</b> 1950                   |
| Bassoon                           | 2120 HG <b>SgGSgGGPDLVQYQPQHGPGLSgAPQ</b> 2144                    |
| Bassoon                           | 3213 <b>SgSgVSgQSgPAPTgYPSgDSgHYTSg</b> L 3232                    |
| CREB coactivator CRTC2 (TORC2)    | 65 SH <b>YGGSGLP</b> NVNQIGCGLAEFQ <b>SLHSP</b> 91                |
| CREB Coactivator CRTC2 (TORC2)    | 170 <b>SSgDSg</b> ALHTSVMN <b>PNPQDTYPGP</b> TP <b>PSVLPS</b> 199 |
| Estrogen receptor beta            | 55 <b>NYSVPSsg</b> TGNLEGG <b>PV</b> 70                           |
| Microtubule-associated Protein 1B | 2018 TTTKT <b>TRSp</b> PDTSAY <b>CYE</b> 2034                     |
| Neurofilament L                   | 38 SAYSS <b>YSA</b> PV <b>SgSgSg</b> L <b>SgVR</b> 54             |
| Neurofilament L                   | 31 SG <b>YSg</b> TAR 37                                           |
| Neurofilament M                   | 43 GS <b>PSgTgVSgSgSgYKR</b> 55                                   |
| Piccolo                           | 2941 <b>TTGPYPETgR</b> 2949                                       |
| Piccolo                           | 2949 QVISGIST <b>PQYSgTg</b> AR 2966                              |
| Ponsin                            | 1189 <b>TPVDYIDLPYSgSgSgPSR</b> 1204                              |
| RNA-binding motif protein 14      | 275 AQ <b>PSgVSg</b> LGAP <b>PYR</b> 296                          |
| Vimentin                          | 51 SL <b>YASgSP</b> GGV 60                                        |
| Prohibitin                        | 101 <b>SQLPRIFTSIGEDYERVLPS</b> .....N <b>ITYLP</b> 261           |
|                                   | 114 259                                                           |

Note: Additional potential *O*-GlcNAc sites with proline at -1 or +3 positions are shown as bold letters (**S/T**).
