# Supplementary material for: Interaction between O-GlcNAc Modification and Tyrosine Phosphorylation of Prohibitin: Implication for a Novel Binary Switch
Source: PLOS journal article supplement (doi:10.1371/journal.pone.0004586), 2009-02-23
Supplement: S3 (10.1371/journal.pone.0004586.s003) [file journal.pone.0004586.s003]

**Table S3.** Salient features of protein sequences listed in Table S1 and Table S2 containing potential O-GlcNAc and phospho tyrosine binary switch.

| Selection criteria #1<br>(No. of sequence listed - 17)                                                                                                                                                                                                                                                                                     | Selection criteria #2<br>(No. of sequence listed - 30)                                                                                                                                                                                                                                                                                      |
|--------------------------------------------------------------------------------------------------------------------------------------------------------------------------------------------------------------------------------------------------------------------------------------------------------------------------------------------|---------------------------------------------------------------------------------------------------------------------------------------------------------------------------------------------------------------------------------------------------------------------------------------------------------------------------------------------|
| 1. Number of proteins with a proline residue at -/+1 and/or -/+3 position from known <i>O</i> -GlcNAc site: 10 (59%).<br>2. Proline residue within -/+ 5 residue from known <i>O</i> -GlcNAc site: 14 (82%).<br>3. Number of proteins containing potential tyrosine phosphorylation site within -/+ 5 residue of known OGN site: 12 (71%). | 1. Number of proteins with a proline residue at -/+1 and/or -/+3 position from potential <i>O</i> -GlcNAc site: 28 (93%).<br>2. Proline residue within -/+ 5 residue from a known phospho tyrosine site: 26 (87%).<br>3. Number of potential <i>O</i> -GlcNAc sites within -/+ 5 residues of known tyrosine phosphorylation site: 26 (87%). |
